# Supplementary material for: Construction of 2D/2D Ni2P/CdS heterojunctions with significantly enhanced photocatalytic H2 evolution performance
Source: Royal Society of Chemistry journal article supplement (doi:10.1039/c9cy02045d), 2019-01-01
Supplement: c9cy02045d1.pdf [file c9cy02045d1.pdf]

## Supporting Information

### **Construction of 2D/2D Ni<sub>2</sub>P/CdS heterojunctions with significantly enhanced photocatalytic H<sub>2</sub> evolution performance**

Chun Liu, Minghui Xiong, Bo Chai,\* Juntao Yan, Guozhi Fan, Guangsen Song\*

School of Chemical and Environmental Engineering, Wuhan Polytechnic University, Wuhan 430023, PR  
China.

\*Corresponding author E-mail: [wilycb@163.com](mailto:wilycb@163.com) (B. Chai)

[gssong2018@163.com](mailto:gssong2018@163.com) (G. Song)

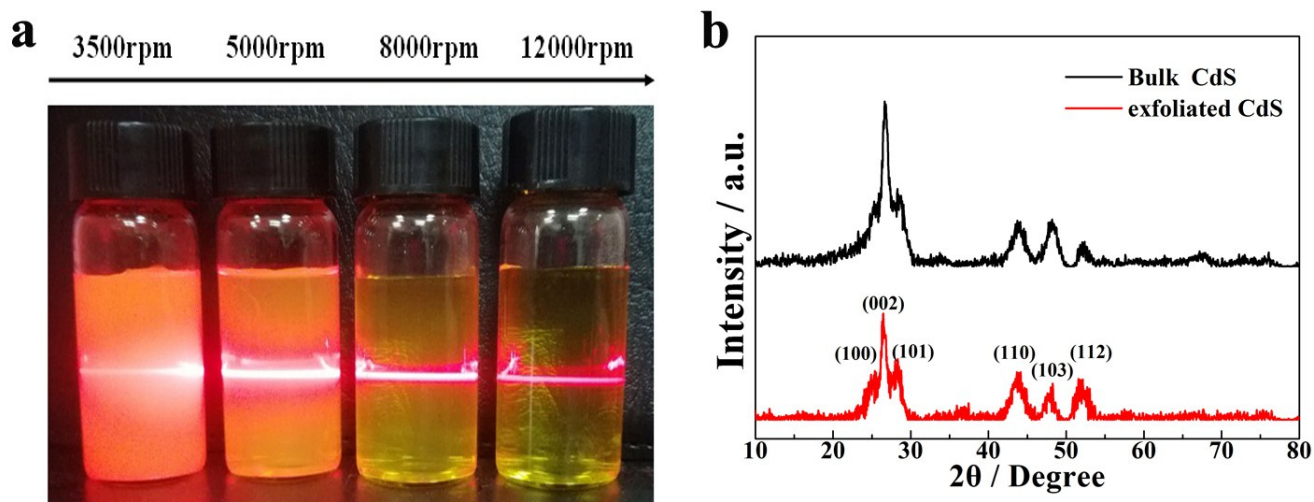

**Fig. S1.** Photographs of CdS dispersion obtained at different centrifugal speeds and the corresponding Tyndall effect (a); XRD pattern of bulk and exfoliated CdS (b).

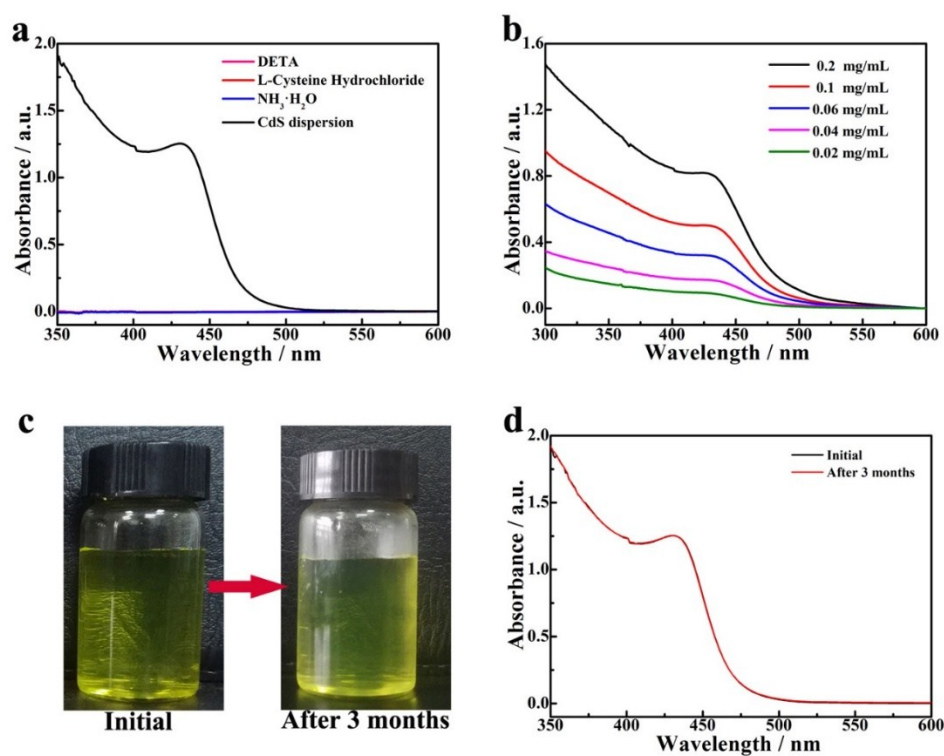

**Fig. S2.** UV-vis absorption spectra of exfoliated CdS dispersion, L-cysteine hydrochloride aqueous solution,  $\text{NH}_3 \cdot \text{H}_2\text{O}$  solution and DETA aqueous solution (a); UV-vis absorption spectra of exfoliated CdS dispersion with the different concentrations (b); Photographs (c) and UV-vis absorption spectra (d) of initial and stored for 3 months CdS dispersion.

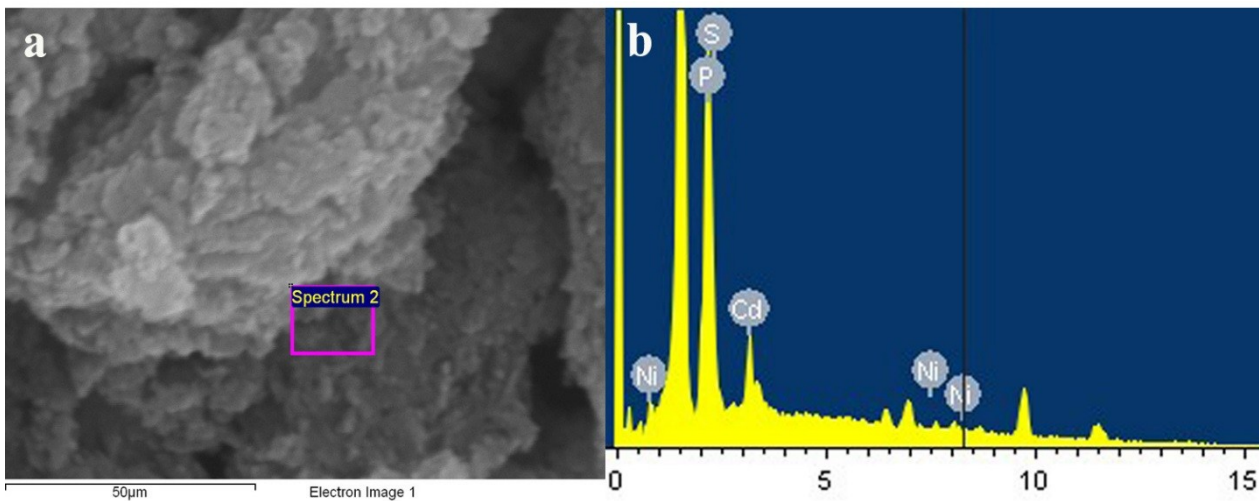

Fig. S3. EDS spectrum of 4wt% Ni<sub>2</sub>P/CdS heterojunction.

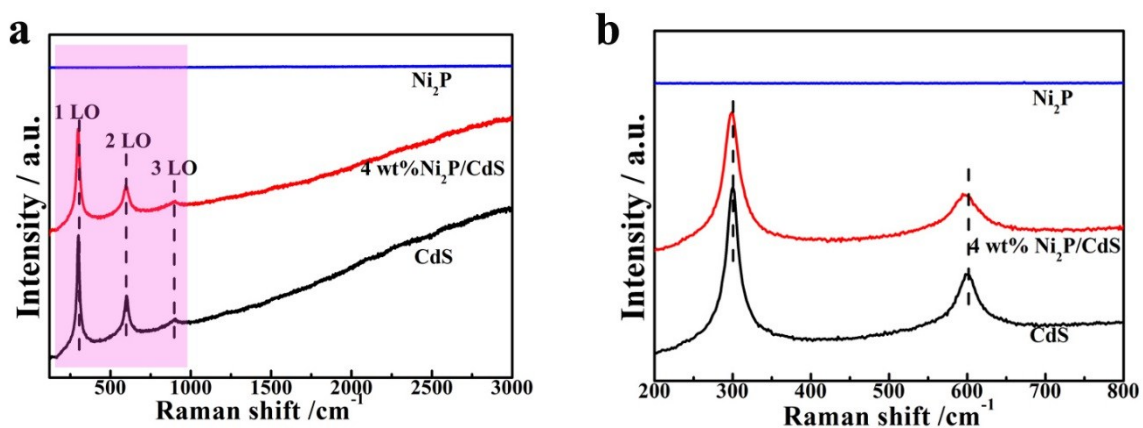

Fig. S4. The Raman spectra of Ni<sub>2</sub>P, CdS and 4wt% Ni<sub>2</sub>P/CdS heterojunction.

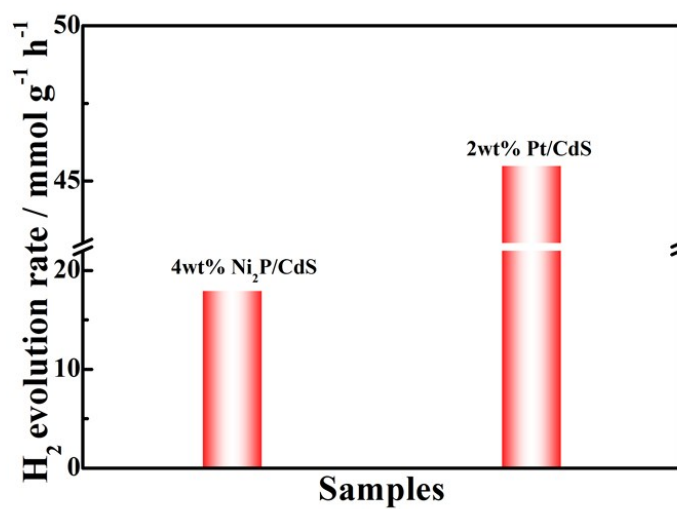

Fig. S5. The H<sub>2</sub> evolution rate of 4wt% Ni<sub>2</sub>P/CdS heterojunction and 2wt% Pt/CdS hybrid.

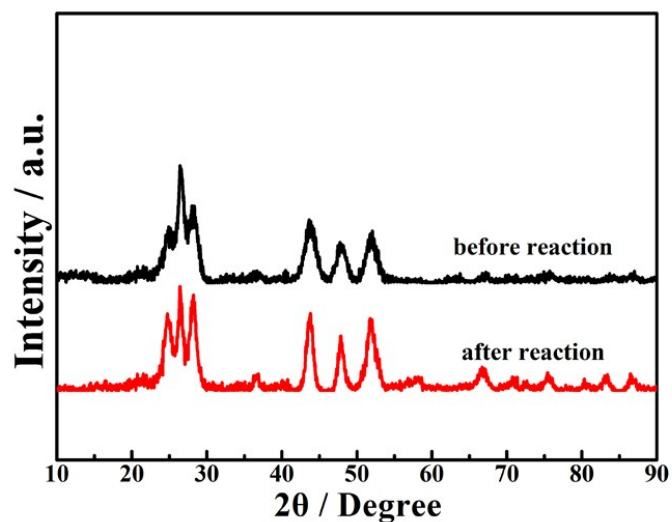

Fig. S6. the XRD pattern of before and after reaction of 4wt% Ni<sub>2</sub>P/CdS heterojunction.

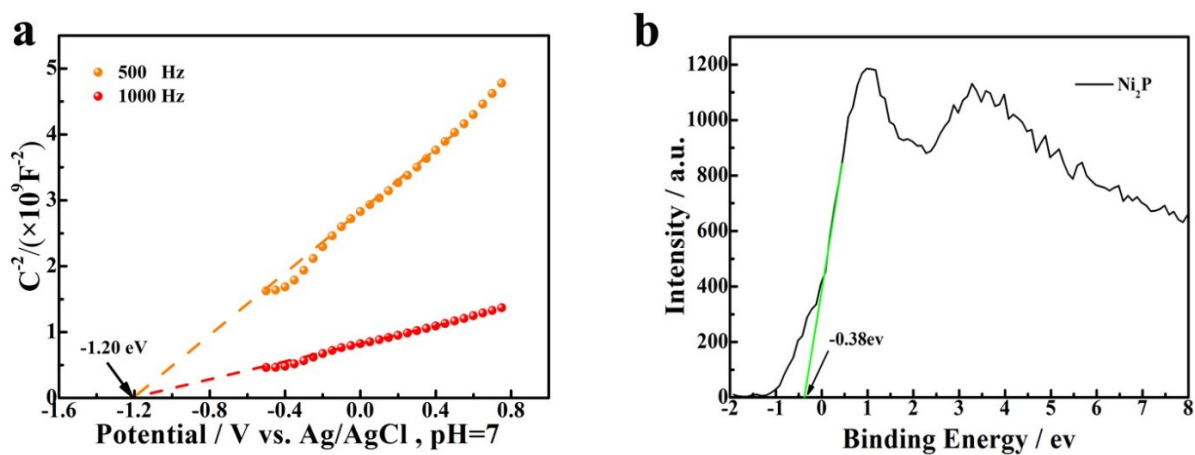

Fig. S7. The Mott-Schottky curves of exfoliated CdS (a) and XPS valence band spectrum of Ni<sub>2</sub>P (b).

**Table S1.** Comparing the photocatalytic H<sub>2</sub> evolution activity with other reported photocatalysts.

| Photocatalyst                                           | Light source          | Sacrificial reagent                               | H <sub>2</sub> (mmol g <sup>-1</sup> h <sup>-1</sup> ) | Reference |
|---------------------------------------------------------|-----------------------|---------------------------------------------------|--------------------------------------------------------|-----------|
| CoP/Zn <sub>0.5</sub> Cd <sub>0.5</sub> S               | $\lambda \geq 420$ nm | Lactic acid                                       | 14.68                                                  | [31]      |
| Ni <sub>2</sub> P/Cd <sub>0.5</sub> Zn <sub>0.5</sub> S | $\lambda \geq 420$ nm | Na <sub>2</sub> S/Na <sub>2</sub> SO <sub>3</sub> | 1.05                                                   | [45]      |
| Ni <sub>2</sub> P/CdS                                   | $\lambda \geq 420$ nm | Lactic acid                                       | 2.07                                                   | [46]      |
| Ni <sub>2</sub> P/Cd <sub>0.5</sub> Zn <sub>0.5</sub> S | $\lambda \geq 400$ nm | Na <sub>2</sub> S-Na <sub>2</sub> SO <sub>3</sub> | 9.12                                                   | [47]      |
| CoP/CdS                                                 | $\lambda \geq 420$ nm | Na <sub>2</sub> S-Na <sub>2</sub> SO <sub>3</sub> | 13.8                                                   | [48]      |
| CoP/Zn <sub>0.5</sub> Cd <sub>0.5</sub> S               | AM 1.5G filter        | Ascorbic acid                                     | 12.18                                                  | [49]      |
| MoS <sub>2</sub> /ZnIn <sub>2</sub> S <sub>4</sub>      | $\lambda \geq 400$ nm | TEOA                                              | 0.89                                                   | [50]      |
| WS <sub>2</sub> /CdS                                    | $\lambda \geq 420$ nm | Lactic acid                                       | 14.1                                                   | [51]      |
| MoS <sub>2</sub> /CdS                                   | $\lambda \geq 420$ nm | Na <sub>2</sub> S/Na <sub>2</sub> SO <sub>3</sub> | 4.65                                                   | [52]      |
| MoSe/ZnIn <sub>2</sub> S <sub>4</sub>                   | $\lambda \geq 420$ nm | Lactic acid                                       | 6.45                                                   | [53]      |
| MoS <sub>2</sub> /ZnIn <sub>2</sub> S <sub>4</sub>      | $\lambda \geq 420$ nm | Lactic acid                                       | 6.88                                                   | [54]      |
| Ni <sub>2</sub> P/CdS                                   | $\lambda \geq 420$ nm | Lactic acid                                       | 17.95                                                  | This Work |
